# Supplementary material for: The adsorption characteristics and degradation mechanism of tinidazole on an anatase TiO2 surface: a DFT study
Source: Royal Society of Chemistry journal article supplement (doi:10.1039/c9ra06665a), 2020-01-01
Supplement: c9ra06665a1.pdf [file c9ra06665a1.pdf]

# The adsorption characteristics and degradation mechanism of tinidazole on anatase TiO<sub>2</sub> surface: A DFT study

Qiaoqiao Qin<sup>1</sup>, Haichuan Qin<sup>1</sup>, Kai Li<sup>1</sup>, Ruolan Tan<sup>2</sup>, Xiangyang Liu<sup>1</sup>, and Laicai Li<sup>1\*</sup>

<sup>1</sup> College of Chemistry and Material Science, Sichuan Normal University, Chengdu 610068, China.

<sup>2</sup> College of Pharmacy, Southwestern Medical University, Luzhou, 646000, China.

Content:

Fig. S1 The adsorption configurations and adsorption distances (Å) of tinidazole on TiO<sub>2</sub>(101) and (001) surfaces under aqueous conditions(Front view and Top view)

Fig. S2 The DOSs and PDOSs of TiO<sub>2</sub>(101) surface and tinidazole adsorption configurations in vacuum conditions

Fig. S3 The DOSs and PDOSs of TiO<sub>2</sub>(001) surface and tinidazole adsorption configurations in vacuum conditions

Fig. S4 The DOSs and PDOSs of TiO<sub>2</sub>(101) surface and tinidazole adsorption configurations in aqueous conditions

Fig. S5 The DOSs and PDOSs of TiO<sub>2</sub>(001) surface and tinidazole adsorption configurations in aqueous conditions

Fig. S6 The configuration of substances in the reaction of tinidazole on the TiO<sub>2</sub>(101) surface in vacuum conditions (Top view)

Fig. S7 The configuration of substances in the reaction of tinidazole on the TiO<sub>2</sub>(001) surface in vacuum conditions (Top view)

Fig. S8 The configuration of substances in the reaction of tinidazole on the TiO<sub>2</sub>(101) surface in aqueous conditions (Front view and Top view)

Fig. S9 The configuration of substances in the reaction of tinidazole on the TiO<sub>2</sub>(001) surface in aqueous conditions (Front view and Top view)

Table S1. The change of the bond length of substances in the reaction of tinidazole on TiO<sub>2</sub>(101) surface

Table S2 Energy and frequency of substances in the reaction of tinidazole on TiO<sub>2</sub>(101) surface

Table S3 The change of the bond length of substances in the reaction of tinidazole on TiO<sub>2</sub>(001) surface

Table S4 Energy and frequency of substances in the reaction of TNZ on TiO<sub>2</sub> (001) surface

Table S5 Adsorption energies for adsorption configurations of tinidazole adsorbed on TiO<sub>2</sub>(101) and (001) surfaces in the VASP program

Table S6 Energy of substances in the reaction of tinidazole on TiO<sub>2</sub> in the VASP program

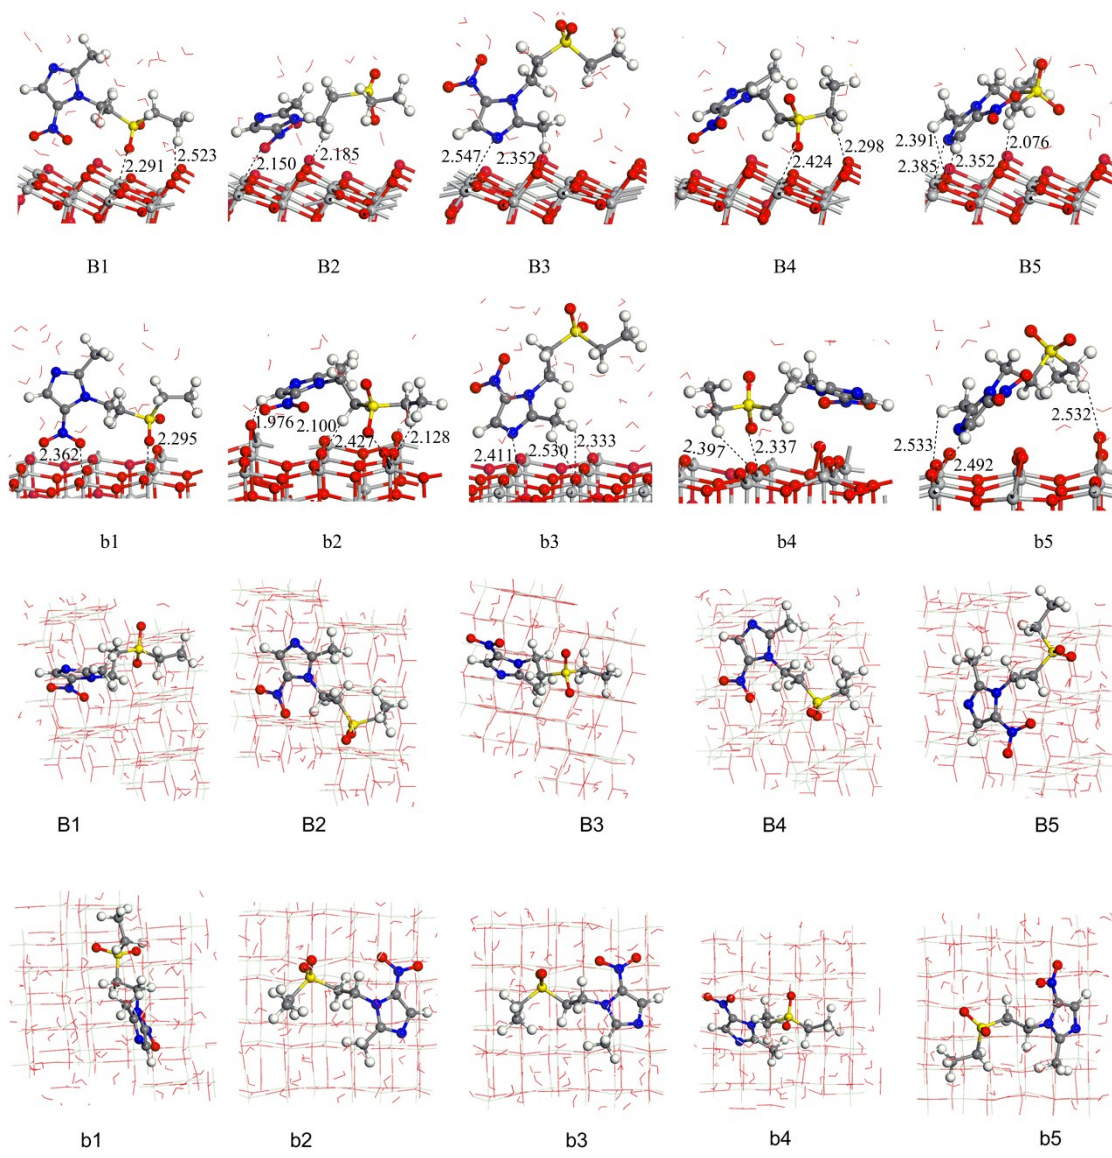

Fig. S1 The adsorption configurations and adsorption distances (Å) of tinidazole on TiO<sub>2</sub>(101) and (001) surfaces under aqueous conditions(Front view and Top view)

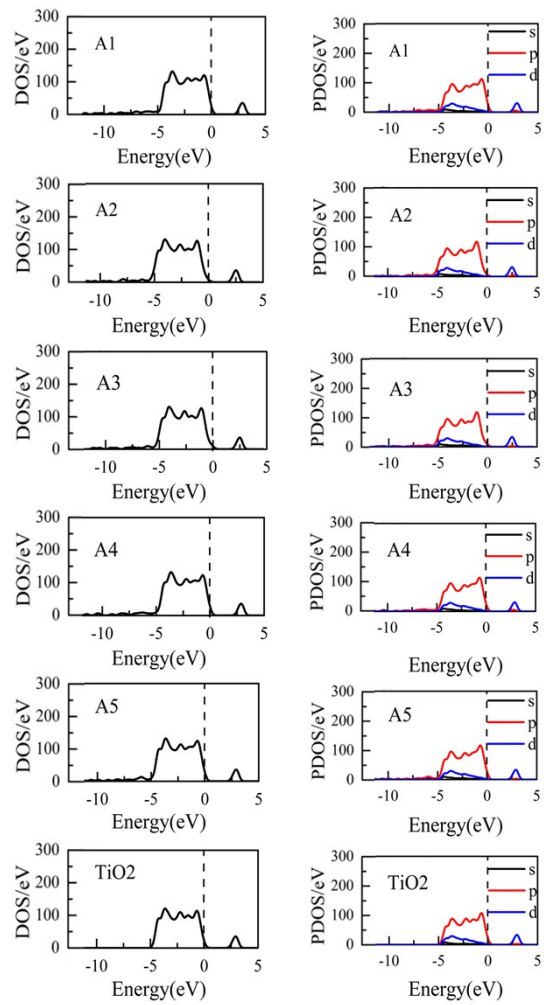

Fig. S2 The DOSs and PDOSs of TiO<sub>2</sub>(101) surface and tinidazole adsorption configurations in vacuum conditions

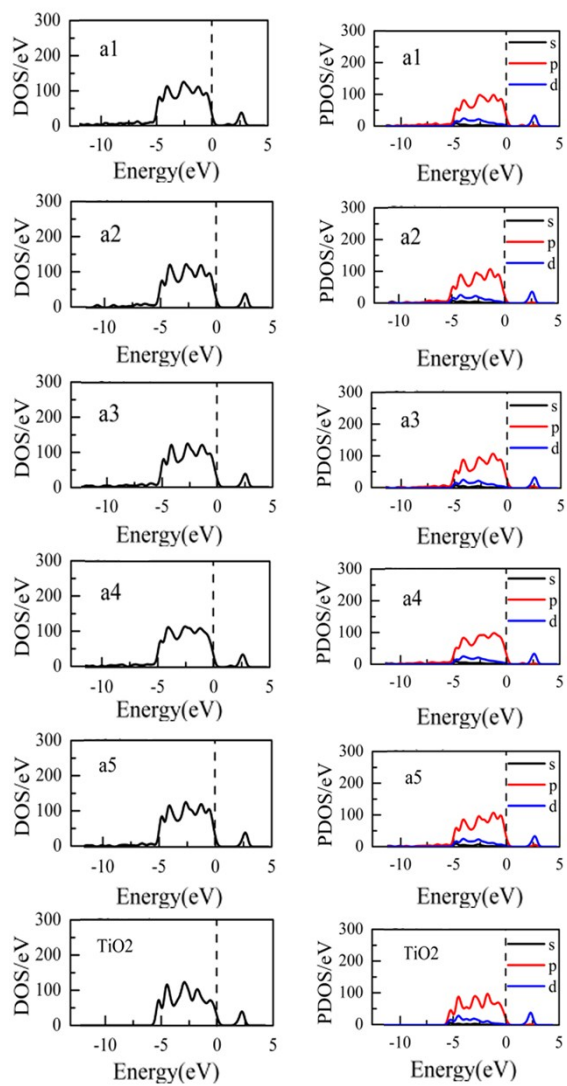

Fig. S3 The DOSs and PDOSs of  $\text{TiO}_2(001)$  surface and tinidazole adsorption configurations in vacuum conditions

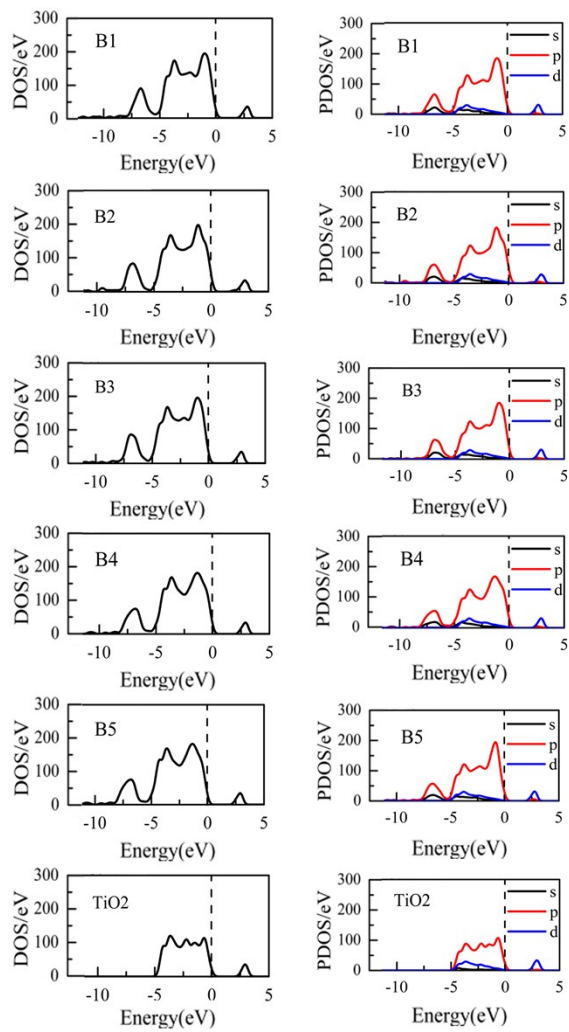

Fig. S4 The DOSs and PDOSs of TiO<sub>2</sub>(101) surface and tinidazole adsorption configurations in aqueous conditions

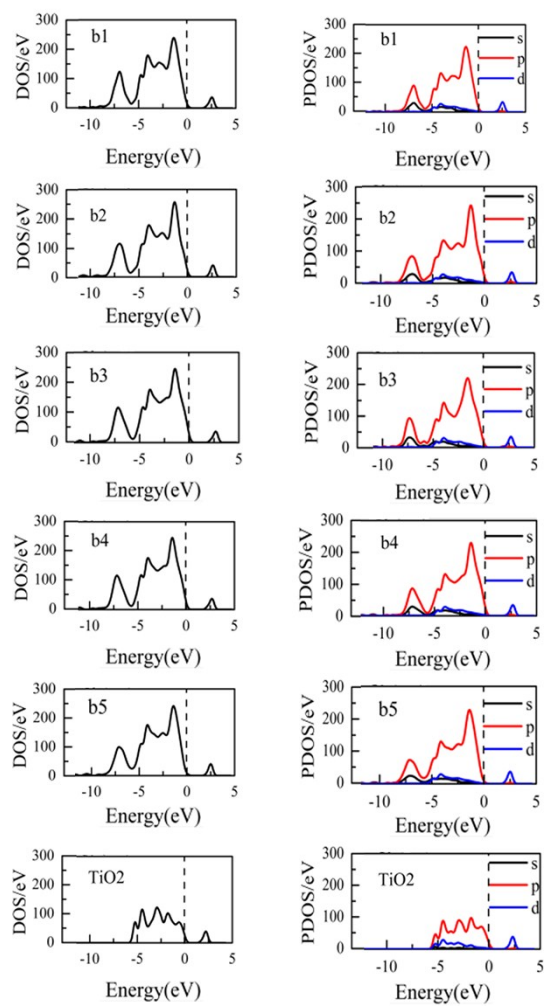

Fig. S5 The DOSs and PDOSs of  $\text{TiO}_2(001)$  surface and tinidazole adsorption configurations in aqueous conditions



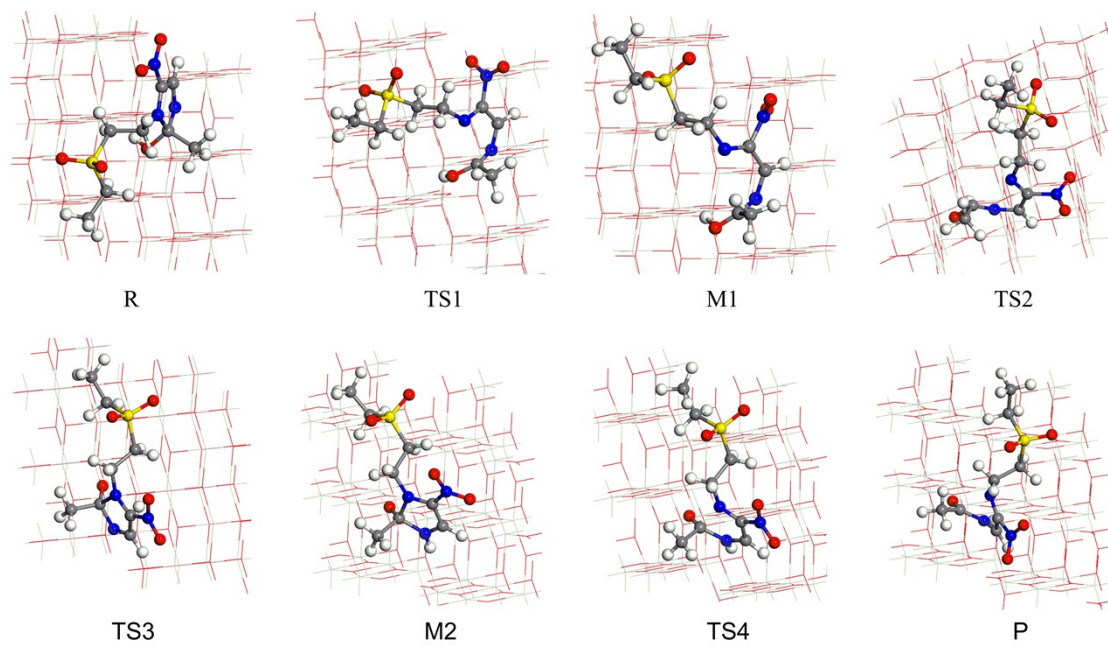

Fig. S6 The configuration of substances in the reaction of tinidazole on the  $\text{TiO}_2(101)$  surface in vacuum conditions (Top view)

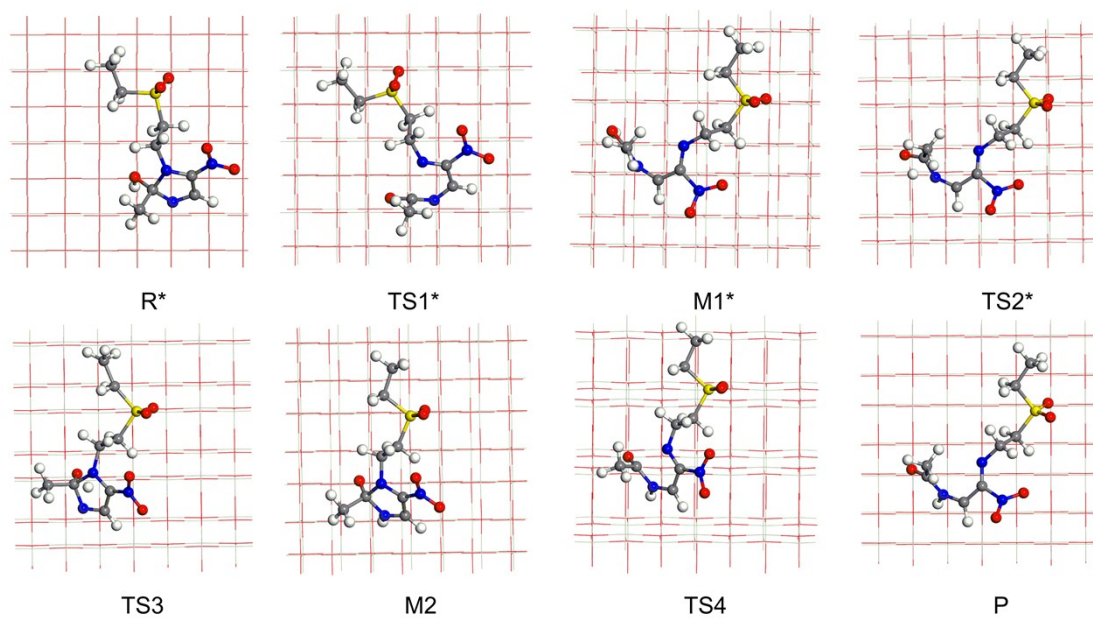

Fig. S7 The configuration of substances in the reaction of tinidazole on the  $\text{TiO}_2(001)$  surface in vacuum conditions (Top view)

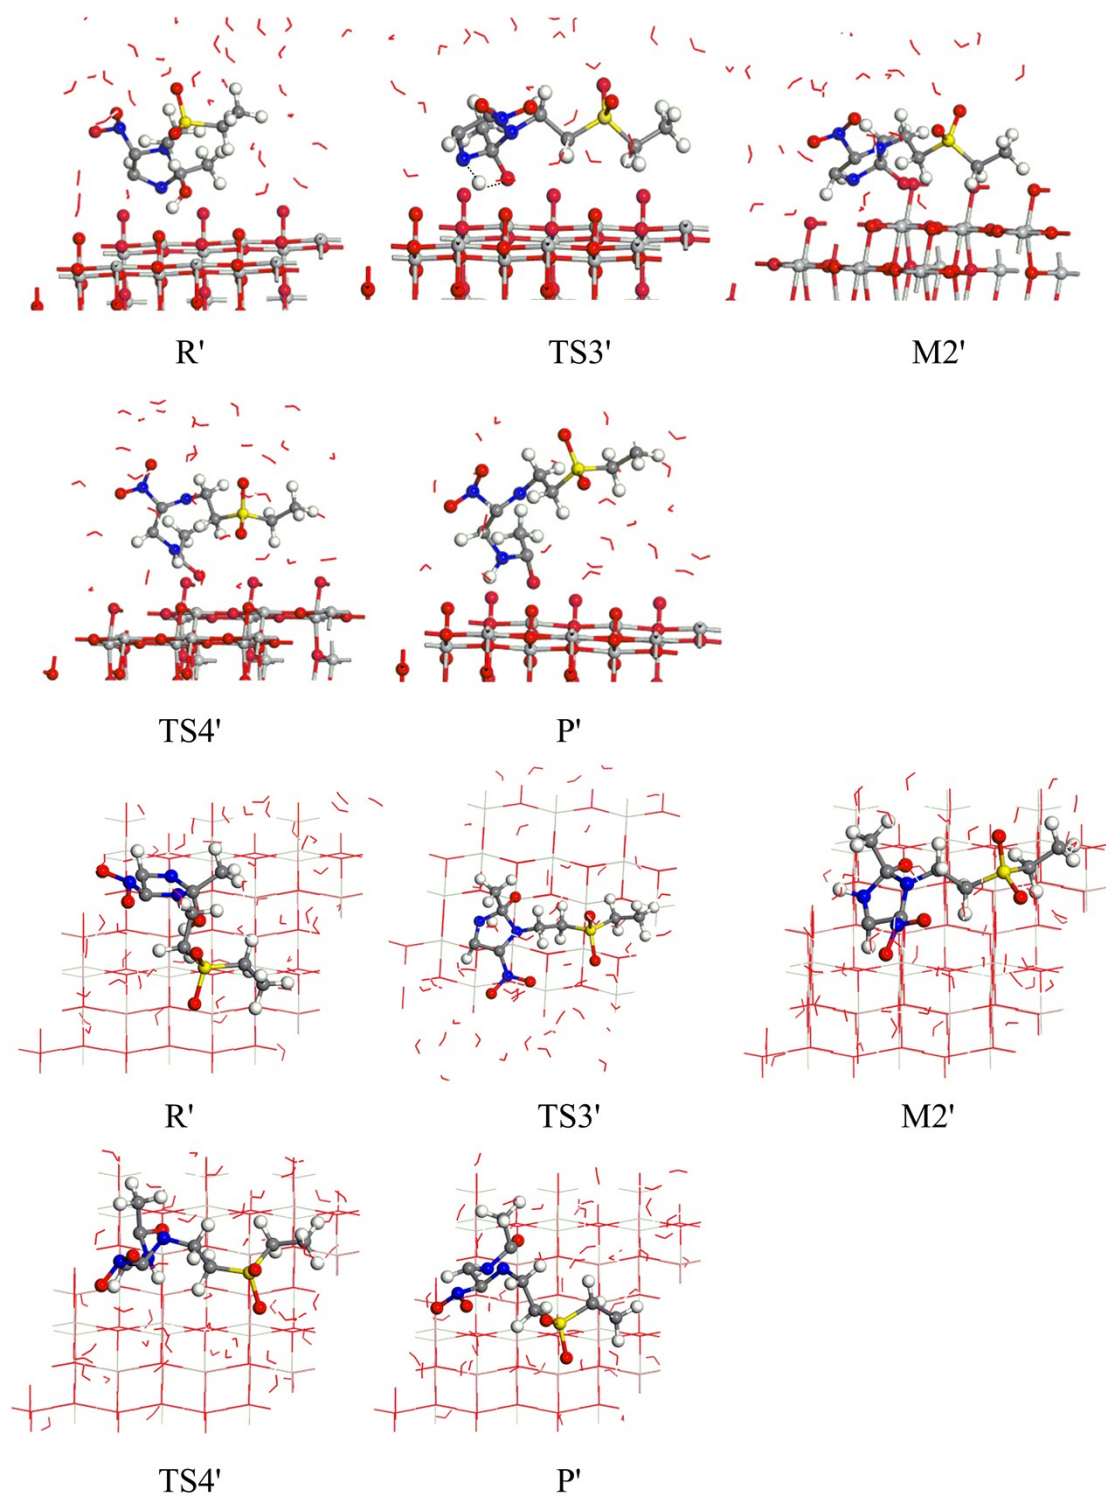

Fig. S8 The configuration of substances in the reaction of tinidazole on the  $\text{TiO}_2(101)$  surface in aqueous conditions (Front view and Top view)



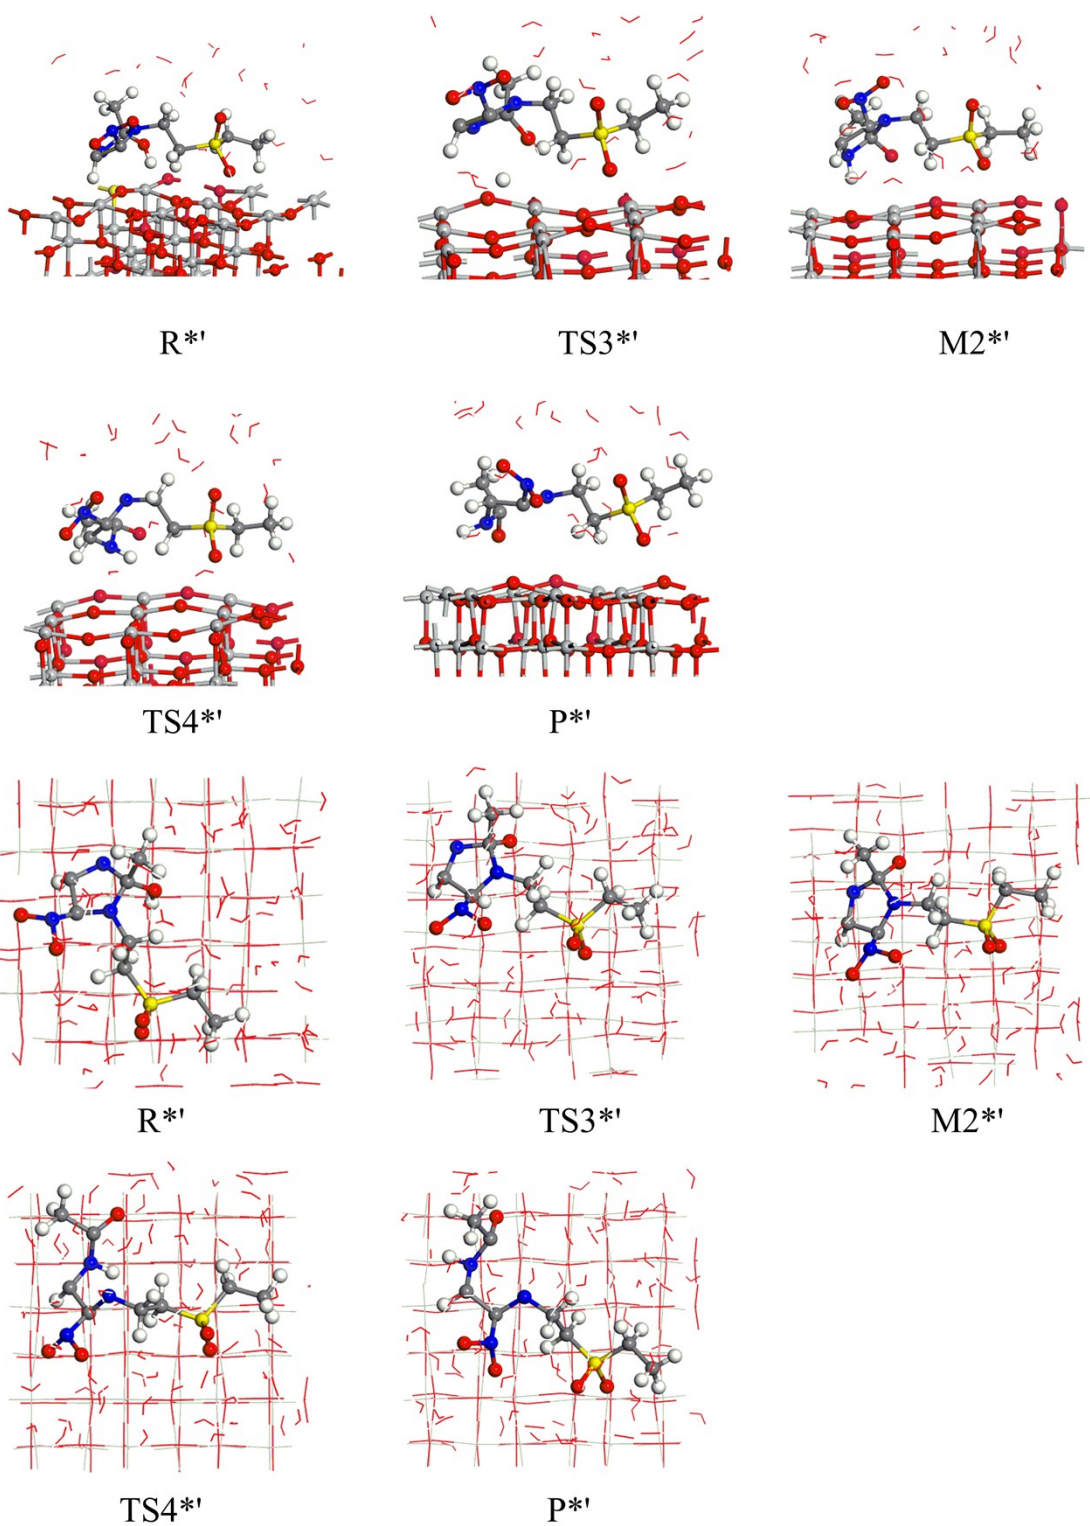

Fig. S9 The configuration of substances in the reaction of tinidazole on the  $\text{TiO}_2(001)$  surface in aqueous conditions (Front view and Top view)

Table S1. The change of the bond length of substances in the reaction of tinidazole on TiO<sub>2</sub>(101) surface

| Pathway | Compound | Bond length(Å) |           |           |           |           |           |
|---------|----------|----------------|-----------|-----------|-----------|-----------|-----------|
|         |          | N(1)-C(2)      | C(2)-N(3) | N(3)-C(4) | C(2)-O(1) | O(1)-H(1) | N(3)-H(1) |
| I       | R        | 1.525          | 1.470     | 1.312     | 1.388     | 1.016     | —         |
|         | TS1      | 2.345          | 1.358     | 1.313     | 1.307     | 1.096     | —         |
|         | M1       | 2.944          | 1.390     | 1.323     | 1.247     | 1.154     | —         |
|         | TS2      | 2.794          | 1.303     | 1.304     | 1.308     | 1.207     | 2.158     |
|         | P        | 3.206          | 1.372     | 1.373     | 1.258     | —         | 1.053     |
| II      | TS3      | 1.682          | 1.469     | 1.228     | 1.326     | 2.237     | 2.236     |
|         | M2       | 1.552          | 1.520     | 1.320     | 1.323     | —         | 1.042     |
|         | TS4      | 2.201          | 1.462     | 1.329     | 1.240     | —         | 1.133     |

Table S2 Energy and frequency of substances in the reaction of tinidazole on TiO<sub>2</sub>(101) surface

| pathway | Compound | E (hatee)     | E <sub>r</sub> (Kcal mol <sup>-1</sup> ) | V(i cm <sup>-1</sup> ) | Compound | E (hatee)     | E <sub>r</sub> (Kcal mol <sup>-1</sup> ) | v(i cm <sup>-1</sup> ) |
|---------|----------|---------------|------------------------------------------|------------------------|----------|---------------|------------------------------------------|------------------------|
| I       | R        | -8772.4742057 | 0                                        |                        | R'       | -8772.5485934 | 0                                        |                        |
|         | TS1      | -8772.4285793 | 28.63                                    | -260                   | TS1'     | -8772.4992772 | 30.95                                    | -290                   |
|         | M1       | -8772.5013747 | -17.05                                   |                        | M1'      | -8772.5668226 | -11.44                                   |                        |
|         | TS2      | -8772.4191941 | 34.52                                    | -1141                  | TS2'     | -8772.5944588 | 28.78                                    | -1684                  |
|         | P        | -8772.4683927 | 3.65                                     |                        | P'       | -8772.5525182 | -2.46                                    |                        |
| II      | TS3      | -8772.4400441 | 21.44                                    | -1646                  | TS3'     | -8772.5229804 | 16.07                                    | -1601                  |
|         | M2       | -8772.4705240 | 2.31                                     |                        | M2'      | -8772.5404442 | 5.11                                     |                        |
|         | TS4      | -8772.4484657 | 16.15                                    | -129                   | TS4'     | -8772.5333028 | 9.59                                     | -257                   |

Table S3 The change of the bond length of substances in the reaction of tinidazole on TiO<sub>2</sub>(001) surface

| Pathway | Compound | Bond length(Å) |           |           |           |           |           |
|---------|----------|----------------|-----------|-----------|-----------|-----------|-----------|
|         |          | N(1)-C(2)      | C(2)-N(3) | N(3)-C(4) | C(2)-O(1) | O(1)-H(1) | N(3)-H(1) |
| I       | R*       | 1.519          | 1.473     | 1.312     | 1.397     | 1.016     | —         |
|         | TS1*     | 2.199          | 1.396     | 1.322     | 1.297     | 1.038     | —         |
|         | M1*      | 3.043          | 1.330     | 1.340     | 1.308     | 1.073     | —         |
|         | TS2*     | 3.055          | 1.345     | 1.309     | 1.302     | 1.237     | 1.467     |
|         | P*       | 3.177          | 1.382     | 1.373     | 1.248     | —         | 1.046     |
| II      | TS3*     | 1.579          | 1.465     | 1.315     | 1.434     | 1.612     | 1.816     |
|         | M2*      | 1.559          | 1.509     | 1.331     | 1.326     | —         | 1.035     |
|         | TS4*     | 2.265          | 1.443     | 1.344     | 1.227     | —         | 1.042     |

Table S4 Energy and frequency of substances in the reaction of TNZ on TiO<sub>2</sub> (001) surface

| pathway | Compound | E (hatee)     | E <sub>r</sub> (Kcal mol <sup>-1</sup> ) | V(i cm <sup>-1</sup> ) | Compound | E (hatee)     | E <sub>r</sub> (Kcal mol <sup>-1</sup> ) | v(i cm <sup>-1</sup> ) |
|---------|----------|---------------|------------------------------------------|------------------------|----------|---------------|------------------------------------------|------------------------|
| I       | R*       | -8772.4551550 | 0                                        |                        | R*'      | -8772.5090559 | 0                                        |                        |
|         | TS1*     | -8772.4221747 | 20.70                                    | -264                   | TS1*'    | -8772.4728783 | 22.70                                    | -287                   |
|         | M1*      | -8772.4532121 | 1.22                                     |                        | M1*'     | -8772.5014883 | 4.75                                     |                        |
|         | TS2*     | -8772.3607533 | 59.24                                    | -1549                  | TS2*'    | -8772.4140780 | 59.60                                    | -1656                  |
|         | P*       | -8772.4575051 | -1.47                                    |                        | P*'      | -8772.5146659 | -3.52                                    |                        |
| II      | TS3*     | -8772.3927960 | 39.13                                    | -1265                  | TS3*'    | -8772.5229804 | 35.23                                    | -1263                  |
|         | M2*      | -8772.4475535 | 4.77                                     |                        | M2*'     | -8772.5404442 | 1.34                                     |                        |
|         | TS4*     | -8772.4239858 | 19.56                                    | -263                   | TS4*'    | -8772.5333028 | 16.10                                    | -256                   |

Table S5 Adsorption energies for adsorption configurations of tinidazole adsorbed on TiO<sub>2</sub> (101) and (001) surfaces in the VASP program

|                      |          | (101) surface         |          | (001) surface         |  |
|----------------------|----------|-----------------------|----------|-----------------------|--|
| conditions           | compound | E <sub>ads</sub> (eV) | compound | E <sub>ads</sub> (eV) |  |
| Vacuum<br>conditions | A1       | 1.82                  | a1       | 2.60                  |  |
|                      | A2       | 1.59                  | a2       | 2.68                  |  |
|                      | A3       | 1.54                  | a3       | 2.48                  |  |
|                      | A4       | 0.75                  | a4       | 2.62                  |  |
|                      | A5       | 2.04                  | a5       | 2.76                  |  |
| Aqueous<br>solutions | B1       | 4.06                  | b1       | 3.97                  |  |
|                      | B2       | -11.15                | b2       | 11.13                 |  |
|                      | B3       | 3.44                  | b3       | 3.90                  |  |
|                      | B4       | 3.78                  | b4       | 3.86                  |  |
|                      | B5       | 3.85                  | b5       | 3.45                  |  |

Table S6 Energy of substances in the reaction of tinidazole on TiO<sub>2</sub> in the VASP program

| Compound | (101) surface |                                          |                                          | Compound | (001) surface |                                          |                                          |
|----------|---------------|------------------------------------------|------------------------------------------|----------|---------------|------------------------------------------|------------------------------------------|
|          | E(eV)         | E <sub>r</sub> (Kcal mol <sup>-1</sup> ) | E <sub>a</sub> (Kcal mol <sup>-1</sup> ) |          | E(eV)         | E <sub>r</sub> (Kcal mol <sup>-1</sup> ) | E <sub>a</sub> (Kcal mol <sup>-1</sup> ) |
| R        | -1012.05690   | 0.00                                     |                                          | R*       | -1010.46510   | 0.00                                     |                                          |
| TS1      | -1010.43050   | 37.51                                    | 37.51                                    | TS1*     | -1009.46280   | 23.11                                    | 23.11                                    |
| M1       | -1013.05110   | -22.93                                   |                                          | M1*      | -1010.47520   | -0.23                                    |                                          |
| TS2      | -1009.97870   | 47.92                                    | 70.85                                    | TS2*     | -1007.81560   | 61.10                                    | 61.33                                    |
| TS3      | -1010.77580   | 29.54                                    | 29.54                                    | TS3*     | -1008.52920   | 44.64                                    | 44.64                                    |
| M2       | -1012.02240   | 0.80                                     |                                          | M2*      | -1009.98810   | 11.00                                    |                                          |
| TS4      | -1011.09700   | 22.14                                    | 21.34                                    | TS4*     | -1009.43160   | 23.83                                    | 12.83                                    |
| P        | -1011.56210   | 11.41                                    |                                          | P*       | -1010.34660   | 2.73                                     |                                          |
| R1'      | -1017.09940   | 0.00                                     |                                          | R1*'     | -1013.52880   | 0.00                                     |                                          |
| TS3'     | -1016.31600   | 18.07                                    | 18.07                                    | TS3*'    | -1011.84460   | 38.84                                    | 38.84                                    |
| M2'      | -1016.76680   | 7.67                                     |                                          | M2*'     | -1013.19300   | 7.74                                     |                                          |
| TS4'     | -1016.23420   | 19.95                                    | 12.28                                    | TS4*'    | -1012.71710   | 18.72                                    | 10.98                                    |
| P'       | -1016.69930   | 9.23                                     |                                          | P*'      | -1013.50350   | 0.58                                     |                                          |
